# Supplementary figures and images for: Infant’s DNA Methylation Age at Birth and Epigenetic Aging Accelerators
Source: Hindawi journal article supplement (doi:10.1155/2016/4515928), 2016-01-01

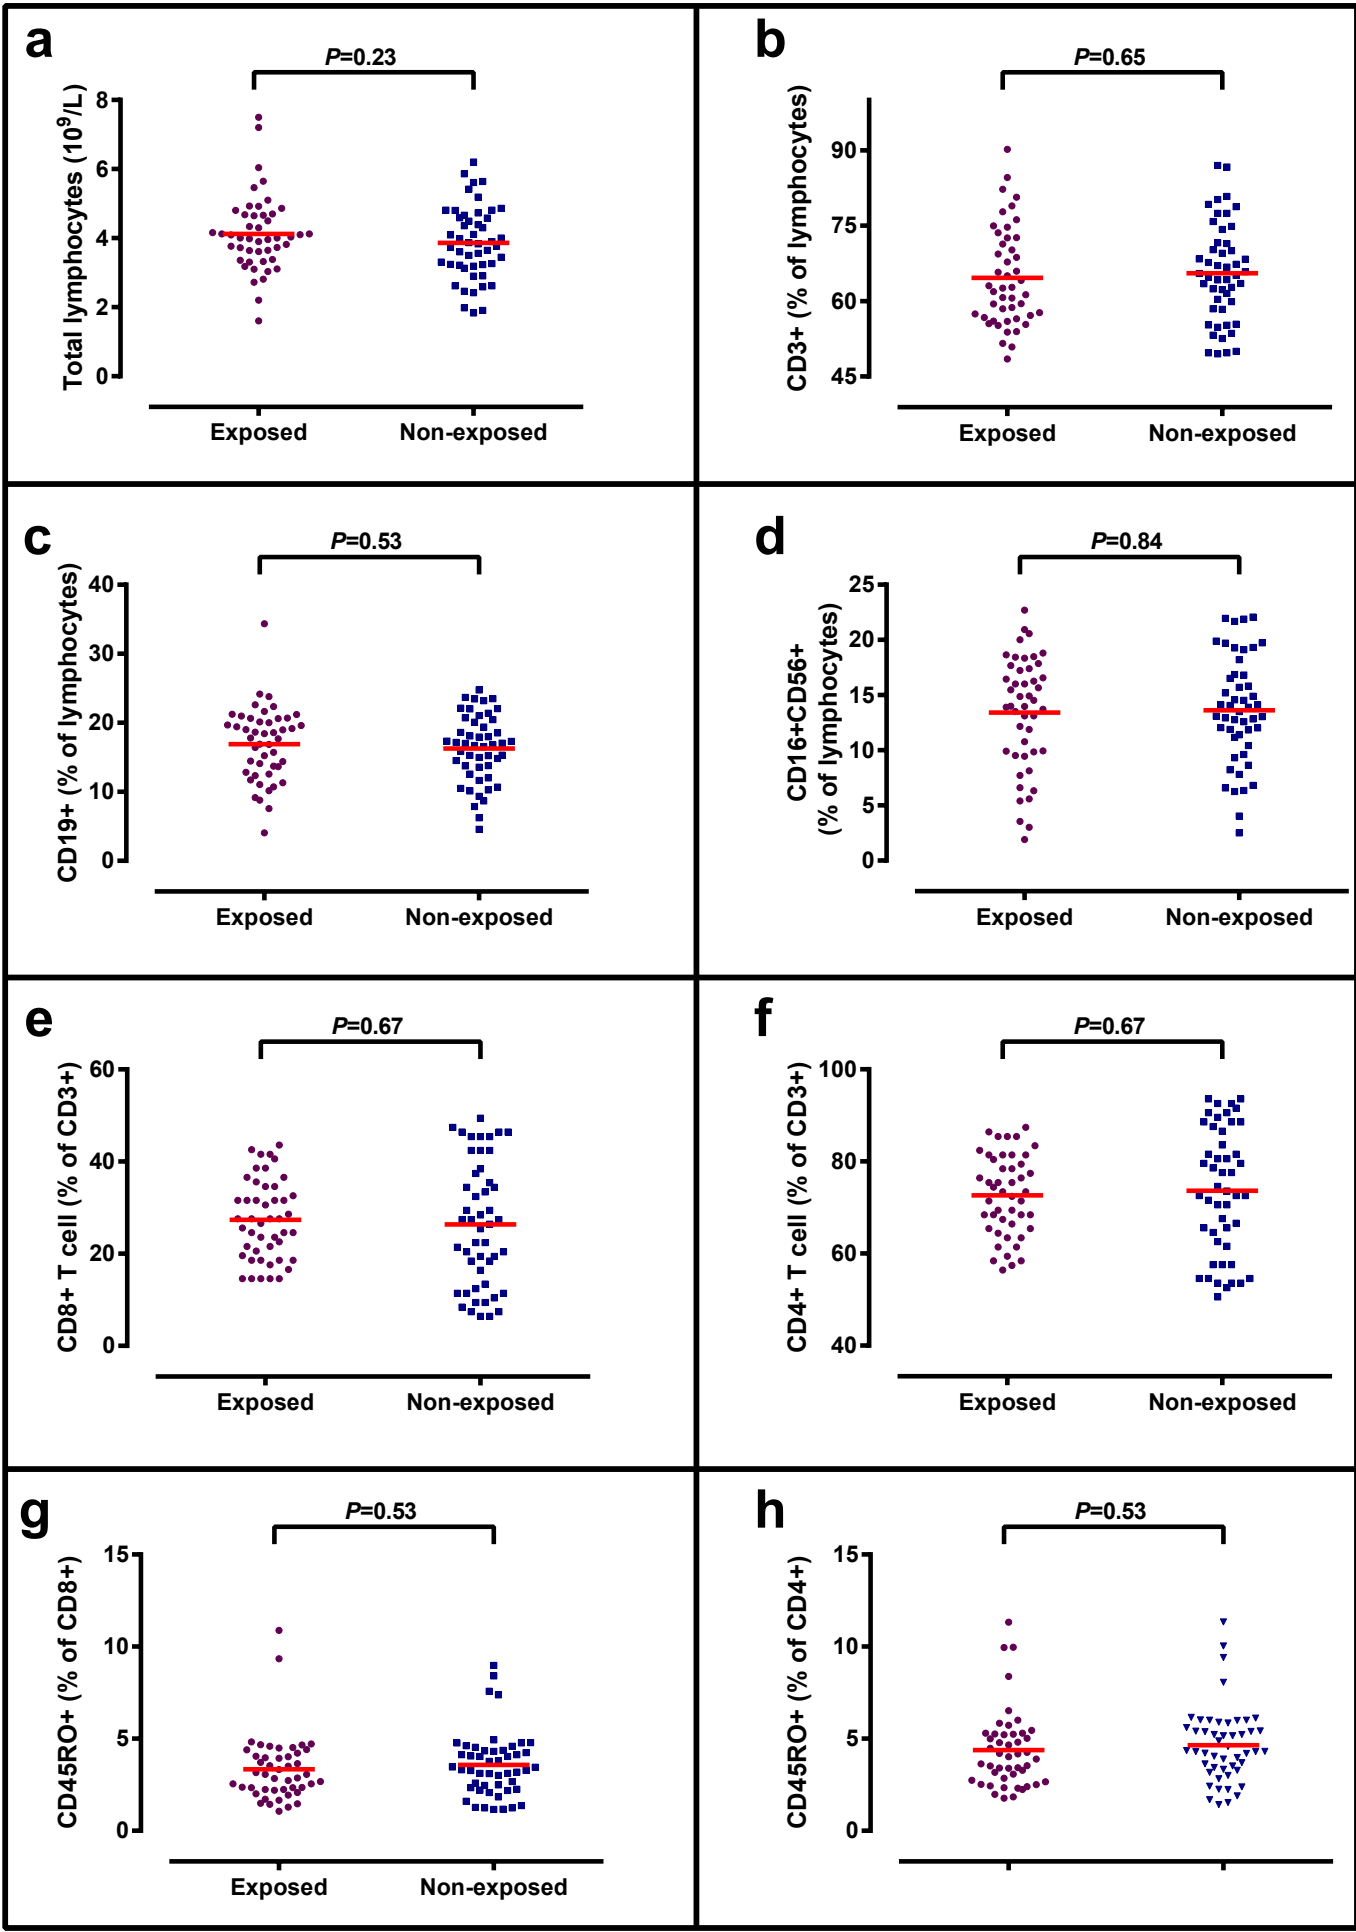

**Figure S2.** Lymphocyte subpopulations in newborns of smoking and non-smoking mothers.

Supplement: f1 [file 4515928.f1.zip]
